# Supplementary material for: Shifting Mineral and Redox Controls on Carbon Cycling in Seasonally Flooded Soils
Source: Copernicus journal article supplement (doi:10.5194/bg-2018-432), 2018-10-12
Supplement: Supplementary file 1 [file bg-2018-432-supplement.pdf]

**Table S1 Average environmental characteristics  $\pm$  standard errors along upland-to-lowland transects by season**

|                        | Cover (%)               | Soil Temp<br>(C°)         | Soil<br>Temp<br>(C°)     | Water Table<br>Depth (cm) | Water Table<br>Depth (cm) | Volumetric<br>Moisture<br>Content (%) | Volumetric<br>Moisture<br>Content (%) |
|------------------------|-------------------------|---------------------------|--------------------------|---------------------------|---------------------------|---------------------------------------|---------------------------------------|
|                        | GS                      | GS                        | NGS                      | GS                        | NGS                       | GS                                    | NGS                                   |
| Upland<br>position     | 39 <sup>a</sup> $\pm$ 7 | 17 <sup>a</sup> $\pm$ 0.4 | 7 <sup>a</sup> $\pm$ 0.5 | -38 <sup>b</sup> $\pm$ 3  | -46 <sup>a</sup> $\pm$ 3  | 0.30 <sup>a</sup> $\pm$ 0.05          | 0.23 <sup>a</sup> $\pm$ 0.02          |
| Transition<br>position | 34 <sup>a</sup> $\pm$ 8 | 16 <sup>a</sup> $\pm$ 0.4 | 6 <sup>a</sup> $\pm$ 0.5 | -20 <sup>a</sup> $\pm$ 6  | -35 <sup>a</sup> $\pm$ 5  | 0.35 <sup>ab</sup> $\pm$ 0.05         | 0.24 <sup>a</sup> $\pm$ 0.04          |
| Lowland<br>position    | 21 <sup>a</sup> $\pm$ 8 | 17 <sup>a</sup> $\pm$ 0.3 | 6 <sup>a</sup> $\pm$ 0.5 | -3 <sup>c</sup> $\pm$ 5   | -18 <sup>b</sup> $\pm$ 6  | 0.50 <sup>b</sup> $\pm$ 0.03          | 0.38 <sup>b</sup> $\pm$ 0.04          |

Seasons are defined as either growing season (GS) or non-growing season (NGS).

Soil temperature and volumetric moisture content were taken at 10cm soil depth.

Letter designations are Tukey's honestly significance test results. Different letter designations indicate a p-value of  $< 0.05$ .

**Table S2 Average soil redox potentials  $\pm$  standard error along upland-to-lowland transects by season**

|                   | E <sub>h</sub><br>(mV)     | E <sub>h</sub><br>(mV)    |
|-------------------|----------------------------|---------------------------|
|                   | GS                         | NGS                       |
| <b>Upland</b>     |                            |                           |
| A                 | 494 <sup>c</sup> $\pm$ 44  | 595 <sup>a</sup> $\pm$ 23 |
| B                 | 457 <sup>bc</sup> $\pm$ 59 | 605 <sup>a</sup> $\pm$ 42 |
| C                 | 393 <sup>bc</sup> $\pm$ 60 | 618 <sup>a</sup> $\pm$ 36 |
| <b>Transition</b> |                            |                           |
| A                 | 243 <sup>ab</sup> $\pm$ 77 | 581 <sup>a</sup> $\pm$ 23 |
| B/C               | 139 <sup>a</sup> $\pm$ 51  | 484 <sup>a</sup> $\pm$ 47 |
| Cg                | 191 <sup>ab</sup> $\pm$ 71 | 476 <sup>a</sup> $\pm$ 47 |
| <b>Lowland</b>    |                            |                           |
| A                 | 95 <sup>a</sup> $\pm$ 34   | 414 <sup>a</sup> $\pm$ 97 |
| C                 | 71 <sup>a</sup> $\pm$ 23   | 453 <sup>a</sup> $\pm$ 61 |
| Cg                | 73 <sup>a</sup> $\pm$ 33   | 435 <sup>a</sup> $\pm$ 83 |

Seasons are defined as either growing season (GS) or non-growing season (NGS).

Mean redox values were assigned to soil horizons using an equal area spline function based on redox values measured at 15-, 30-, and 45 cm depths.

Letter designations are Tukey's honestly significance test results.

Different letter designations indicate a p-value of  $< 0.05$ .

**Table S3 Fixed effect parameters from the linear mixed models along upland-to-lowland transects**

| Variable            | Degrees<br>of<br>freedom | Regression<br>Coefficient $\pm$<br>standard error | F - value | Prob > F | Landscape Position<br>Prob >F |
|---------------------|--------------------------|---------------------------------------------------|-----------|----------|-------------------------------|
| <b>A-horizon</b>    |                          |                                                   |           |          |                               |
| Root Biomass        | 19                       | 0.21 $\pm$ 0.14                                   | 0.00      | NS       | <0.05                         |
| Fe <sub>o</sub>     | 20                       | 0.07 $\pm$ 0.19                                   | 0.96      | NS       | NS                            |
| Al <sub>o</sub>     | 20                       | 0.72 $\pm$ 0.26                                   | 3.71      | NS       | <0.05                         |
| Clay                | 19                       | 0.01 $\pm$ 0.27                                   | 0.13      | NS       | NS                            |
| E <sub>h</sub>      | 24                       | -0.30 $\pm$ 0.24                                  | 6.32      | <0.05    | NS                            |
| <b>B/C-horizon</b>  |                          |                                                   |           |          |                               |
| Root Biomass        | 19                       | -0.17 $\pm$ 0.11                                  | 5.41      | <0.05    | NS                            |
| Fe <sub>o</sub>     | 20                       | 0.26 $\pm$ 0.14                                   | 0.71      | NS       | <0.01                         |
| Al <sub>o</sub>     | 20                       | 0.38 $\pm$ 0.11                                   | 6.05      | <0.05    | <0.05                         |
| Clay                | 19                       | 0.30 $\pm$ 0.13                                   | 7.01      | <0.01    | <0.05                         |
| E <sub>h</sub>      | 24                       | 0.11 $\pm$ 0.12                                   | 0.06      | NS       | <0.05                         |
| <b>C/Cg-horizon</b> |                          |                                                   |           |          |                               |
| Root Biomass        | 19                       | 0.01 $\pm$ 0.2                                    | 2.90      | NS       | <0.05                         |
| Fe <sub>o</sub>     | 20                       | 0.004 $\pm$ 0.02                                  | 0.08      | NS       | NS                            |
| Al <sub>o</sub>     | 20                       | 0.09 $\pm$ 0.03                                   | 16.10     | <0.01    | NS                            |
| Clay                | 19                       | 0.01 $\pm$ 0.03                                   | 3.65      | NS       | <0.05                         |
| E <sub>h</sub>      | 24                       | -0.05 $\pm$ 0.04                                  | 2.84      | NS       | <0.01                         |

Model parameters with p-values > 0.05 are denoted as not-significant with the letters NS.

**Table S4 Average relative abundance  $\pm$  standard error of carbon functional groups of solid samples identified by C NEXAFS along upland-to-lowland transects**

|            | Phenolic                   | Aromatic                   | Aliphatic                  | Carboxylic & Amide           | Alkyl-OH                    | Carbonyl                   | Carboxylic : aromatic         |
|------------|----------------------------|----------------------------|----------------------------|------------------------------|-----------------------------|----------------------------|-------------------------------|
| Upland     |                            |                            |                            |                              |                             |                            |                               |
| A          | 12 <sup>ab</sup> $\pm$ 0.6 | 14 <sup>ab</sup> $\pm$ 1.3 | 7 <sup>ac</sup> $\pm$ 0.6  | 29 <sup>abcd</sup> $\pm$ 0.8 | 20 <sup>abc</sup> $\pm$ 0.9 | 19 <sup>ab</sup> $\pm$ 0.5 | 2.24 <sup>ab</sup> $\pm$ 0.23 |
| B          | 8 <sup>ab</sup> $\pm$ 1.9  | 8 <sup>a</sup> $\pm$ 1.3   | 5 <sup>c</sup> $\pm$ 1.2   | 37 <sup>e</sup> $\pm$ 0.8    | 24 <sup>a</sup> $\pm$ 1.4   | 19 <sup>ab</sup> $\pm$ 0.2 | 5.77 <sup>a</sup> $\pm$ 1.63  |
| C          | 9 <sup>ab</sup> $\pm$ 0.7  | 11 <sup>ab</sup> $\pm$ 1.9 | 5 <sup>c</sup> $\pm$ 1.6   | 34 <sup>cde</sup> $\pm$ 1.7  | 22 <sup>abc</sup> $\pm$ 1.3 | 19 <sup>ab</sup> $\pm$ 1.3 | 3.96 <sup>ab</sup> $\pm$ 0.97 |
| Transition |                            |                            |                            |                              |                             |                            |                               |
| A          | 12 <sup>a</sup> $\pm$ 0.5  | 15 <sup>b</sup> $\pm$ 1.2  | 10 <sup>ab</sup> $\pm$ 0.5 | 26 <sup>ab</sup> $\pm$ 1.1   | 19 <sup>bc</sup> $\pm$ 0.5  | 19 <sup>ab</sup> $\pm$ 0.4 | 2.00 <sup>b</sup> $\pm$ 0.27  |
| C          | 10 <sup>ab</sup> $\pm$ 0.6 | 12 <sup>ab</sup> $\pm$ 1.4 | 6 <sup>ac</sup> $\pm$ 0.9  | 35 <sup>de</sup> $\pm$ 2.2   | 22 <sup>abc</sup> $\pm$ 0.5 | 15 <sup>a</sup> $\pm$ 2.5  | 3.33 <sup>ab</sup> $\pm$ 0.48 |
| Cg         | 7 <sup>b</sup> $\pm$ 1.3   | 12 <sup>ab</sup> $\pm$ 3.3 | 4 <sup>c</sup> $\pm$ 0.8   | 32 <sup>bcd</sup> $\pm$ 1.9  | 22 <sup>abc</sup> $\pm$ 2.3 | 23 <sup>a</sup> $\pm$ 0.5  | 3.31 <sup>ab</sup> $\pm$ 1.10 |
| Lowland    |                            |                            |                            |                              |                             |                            |                               |
| A          | 12 <sup>a</sup> $\pm$ 0.6  | 16 <sup>b</sup> $\pm$ 0.8  | 12 <sup>a</sup> $\pm$ 0.3  | 24 <sup>a</sup> $\pm$ 0.8    | 19 <sup>c</sup> $\pm$ 0.5   | 18 <sup>ab</sup> $\pm$ 0.4 | 1.52 <sup>b</sup> $\pm$ 0.19  |
| C          | 11 <sup>ab</sup> $\pm$ 0.4 | 13 <sup>ab</sup> $\pm$ 0.8 | 10 <sup>a</sup> $\pm$ 1.2  | 28 <sup>abc</sup> $\pm$ 1.3  | 21 <sup>abc</sup> $\pm$ 0.9 | 18 <sup>ab</sup> $\pm$ 0.4 | 2.26 <sup>ab</sup> $\pm$ 0.27 |
| Cg         | 10 <sup>ab</sup> $\pm$ 0.7 | 8 <sup>a</sup> $\pm$ 2.4   | 3 <sup>c</sup> $\pm$ 1.3   | 37 <sup>de</sup> $\pm$ 1.4   | 24 <sup>ab</sup> $\pm$ 1.9  | 19 <sup>ab</sup> $\pm$ 0.6 | 6.51 <sup>a</sup> $\pm$ 2.87  |

Letter designations are Tukey's post hoc honesty test results. Different letter designations indicate a p-value of  $< 0.05$ .

**Table S5 FT-ICR-MS metrics  $\pm$  standard error of water extracts by position and horizon**

|            | Total Peaks                | O:C                          | H:C                          | DBE                          | NOSC                           | AImod                         | Molecular Weight           |
|------------|----------------------------|------------------------------|------------------------------|------------------------------|--------------------------------|-------------------------------|----------------------------|
| Upland     |                            |                              |                              |                              |                                |                               |                            |
| A          | 422 <sup>a</sup> $\pm$ 30  | 0.38 <sup>a</sup> $\pm$ 0.02 | 1.46 <sup>a</sup> $\pm$ 0.03 | 3.67 <sup>a</sup> $\pm$ 0.39 | -0.60 <sup>ab</sup> $\pm$ 0.07 | 0.16 <sup>a</sup> $\pm$ 0.02  | 183 <sup>ab</sup> $\pm$ 22 |
| B          | 372 <sup>a</sup> $\pm$ 17  | 0.34 <sup>a</sup> $\pm$ 0.02 | 1.51 <sup>a</sup> $\pm$ 0.06 | 3.19 <sup>a</sup> $\pm$ 0.20 | -0.80 <sup>a</sup> $\pm$ 0.12  | 0.12 <sup>a</sup> $\pm$ 0.01  | 153 <sup>ab</sup> $\pm$ 16 |
| C          | 392 <sup>a</sup> $\pm$ 32  | 0.37 <sup>a</sup> $\pm$ 0.03 | 1.47 <sup>a</sup> $\pm$ 0.06 | 3.84 <sup>a</sup> $\pm$ 0.38 | -0.65 <sup>ab</sup> $\pm$ 0.11 | 0.13 <sup>ab</sup> $\pm$ 0.02 | 158 <sup>ab</sup> $\pm$ 27 |
| Transition |                            |                              |                              |                              |                                |                               |                            |
| A          | 744 <sup>a</sup> $\pm$ 180 | 0.40 <sup>a</sup> $\pm$ 0.02 | 1.45 <sup>a</sup> $\pm$ 0.03 | 2.72 <sup>a</sup> $\pm$ 0.33 | -0.55 <sup>ab</sup> $\pm$ 0.05 | 0.19 <sup>ab</sup> $\pm$ 0.02 | 211 <sup>ab</sup> $\pm$ 22 |
| C          | 385 <sup>a</sup> $\pm$ 55  | 0.41 <sup>a</sup> $\pm$ 0.02 | 1.38 <sup>a</sup> $\pm$ 0.04 | 3.28 <sup>a</sup> $\pm$ 0.34 | -0.48 <sup>ab</sup> $\pm$ 0.06 | 0.16 <sup>ab</sup> $\pm$ 0.02 | 177 <sup>ab</sup> $\pm$ 25 |
| Cg         | 783 <sup>a</sup> $\pm$ 278 | 0.36 <sup>a</sup> $\pm$ 0.03 | 1.42 <sup>a</sup> $\pm$ 0.05 | 3.79 <sup>a</sup> $\pm$ 0.59 | -0.64 <sup>ab</sup> $\pm$ 0.09 | 0.14 <sup>ab</sup> $\pm$ 0.03 | 157 <sup>ab</sup> $\pm$ 23 |
| Lowland    |                            |                              |                              |                              |                                |                               |                            |
| A          | 990 <sup>a</sup> $\pm$ 265 | 0.42 <sup>a</sup> $\pm$ 0.02 | 1.46 <sup>a</sup> $\pm$ 0.03 | 3.35 <sup>a</sup> $\pm$ 0.23 | -0.56 <sup>ab</sup> $\pm$ 0.08 | 0.23 <sup>b</sup> $\pm$ 0.02  | 238 <sup>b</sup> $\pm$ 18  |
| C          | 626 <sup>a</sup> $\pm$ 304 | 0.44 <sup>a</sup> $\pm$ 0.02 | 1.32 <sup>a</sup> $\pm$ 0.05 | 2.91 <sup>a</sup> $\pm$ 0.36 | -0.36 <sup>b</sup> $\pm$ 0.09  | 0.14 <sup>ab</sup> $\pm$ 0.02 | 139 <sup>a</sup> $\pm$ 17  |
| Cg         | 382 <sup>a</sup> $\pm$ 41  | 0.39 <sup>a</sup> $\pm$ 0.02 | 1.42 <sup>a</sup> $\pm$ 0.05 | 3.40 <sup>a</sup> $\pm$ 0.29 | -0.60 <sup>ab</sup> $\pm$ 0.09 | 0.14 <sup>ab</sup> $\pm$ 0.01 | 149 <sup>ab</sup> $\pm$ 13 |

Letter designations are Tukey's post hoc honesty test results. Different letter designations indicate a p-value of  $< 0.05$ .
